# Supplementary material for: Polarized Light Pollution of Fixed-Tilt Photovoltaic Solar Panels Measured by Drone-Polarimetry and Its Visual-Ecological Importance
Source: MDPI journal article supplement (doi:10.3390/rs16071177), 2024-03-28
Supplement: s1 [file s1]

# Electronic Supplementary Material

for

## **Polarized light pollution of fixed-tilt photovoltaic solar panels measured by drone-polarimetry and its visual-ecological importance**

**Péter Takács<sup>1,2</sup>, Dénes Száz<sup>1</sup>, Balázs Bernáth<sup>1,2</sup>, István Pomozi<sup>2</sup>, Gábor Horváth<sup>1,\*</sup>**

*1: Environmental Optics Laboratory, Department of Biological Physics, ELTE Eötvös Loránd University, H-1117 Budapest, Pázmány sétány 1, Hungary*

*2: Drem Innovation and Consulting Ltd., H-1033 Budapest, Szentendrei út 95., Hungary,*

*peter.takacs@drem.hu (orcid: 0000-0002-5668-0901)*

*(orcid: 0000-0002-9087-0928)*

*(orcid: 0000-0003-1712-3288)*

*(orcid: 0009-0004-6474-2764)*

*\*Corresponding author, e-mail address: gh@arago.elte.hu (orcid: 0000-0002-9008-2411)*

This file contains the following: Supplementary Tables S1, S2  
Supplementary Figures S1, S2, S3, S4, S5, S6

**Supplementary Table S1:** Polarized light pollution  $plp$  (%) of solar panels versus time  $t$  (local summer time = UTC + 2 h) from sunrise to sunset on the sunny day (30 June 2022) when the drone-polarimeter's azimuth was perpendicular (pointing toward North) and parallel (pointing toward East) to the solar panel rows being parallel to East-West.

| Figure (ID number)   | situation                     | time<br>(UTC + 2 h) | $plp$<br>( $d > 10^\circ$ , $65^\circ < \alpha < 115^\circ$ ) |
|----------------------|-------------------------------|---------------------|---------------------------------------------------------------|
| Fig. 2A,E,I,M (438)  | sunny 1, perpendicular, North | 5:01                | 16.68 %                                                       |
| Fig. 2B,F,J,N (247)  | sunny 2, perpendicular, North | 7:01                | 9.53 %                                                        |
| Fig. 2C,G,K,O (190)  | sunny 3, perpendicular, North | 8:58                | 20.63 %                                                       |
| Fig. 2D,H,L,P (181)  | sunny 4, perpendicular, North | 10:58               | 26.98 %                                                       |
| Fig. S1A,F,K,P (163) | sunny 5, perpendicular, North | 12:59               | 28.94 %                                                       |
| Fig. S1B,G,L,Q (166) | sunny 6, perpendicular, North | 15:00               | 21.99 %                                                       |
| Fig. S1C,H,M,R (187) | sunny 7, perpendicular, North | 16:14               | 20.36 %                                                       |
| Fig. S1D,I,N,S (180) | sunny 8, perpendicular, North | 18:30               | 7.50 %                                                        |
| Fig. S1E,J,O,T (166) | sunny 9, perpendicular, North | 20:15               | 14.29 %                                                       |
|                      |                               |                     |                                                               |
| Fig. 3A,E,I,M (468)  | sunny 1, parallel, East       | 5:01                | 52.39 %                                                       |
| Fig. 3B,F,J,N (267)  | sunny 2, parallel, East       | 7:01                | 58.46 %                                                       |
| Fig. 3C,G,K,O (214)  | sunny 3, parallel, East       | 8:58                | 57.07 %                                                       |
| Fig. 3D,H,L,P (196)  | sunny 4, parallel, East       | 10:58               | 46.20 %                                                       |
| Fig. S2A,F,K,P (184) | sunny 5, parallel, East       | 12:59               | 31.67 %                                                       |
| Fig. S2B,G,L,Q (184) | sunny 6, parallel, East       | 15:00               | 29.96 %                                                       |
| Fig. S2C,H,M,R (208) | sunny 7, parallel, East       | 16:14               | 29.88 %                                                       |
| Fig. S2D,I,N,S (199) | sunny 8, parallel, East       | 18:30               | 35.01 %                                                       |
| Fig. S2E,J,O,T (187) | sunny 9, parallel, East       | 20:15               | 25.98 %                                                       |



**Supplementary Table S2:** Polarized light pollution  $plp$  (%) of solar panels versus time  $t$  (local summer time = UTC + 2 h) from sunrise to sunset on the overcast day (24 August 2022) when the drone-polarimeter's azimuth was perpendicular (pointing toward North) and parallel (pointing toward East) to the solar panel rows being parallel to East-West.

| Figure (ID number)   | situation                        | time<br>(UTC + 2 h) | $plp$<br>( $d > 10^\circ$ , $65^\circ < \alpha < 115^\circ$ ) |
|----------------------|----------------------------------|---------------------|---------------------------------------------------------------|
| Fig. S3A,E,I,M (238) | overcast 1, perpendicular, North | 6:19                | 27.41 %                                                       |
| Fig. S3B,F,J,N (208) | overcast 2, perpendicular, North | 8:07                | 17.23 %                                                       |
| Fig. S3C,G,K,O (139) | overcast 3, perpendicular, North | 10:06               | 28.38 %                                                       |
| Fig. S3D,H,L,P (079) | overcast 4, perpendicular, North | 12:06               | 34.57 %                                                       |
| Fig. S4A,E,I,M (164) | overcast 5, perpendicular, North | 14:11               | 28.17 %                                                       |
| Fig. S4B,F,J,N (148) | overcast 6, perpendicular, North | 16:05               | 31.69 %                                                       |
| Fig. S4C,G,K,O (103) | overcast 7, perpendicular, North | 18:05               | 26.22 %                                                       |
| Fig. S4D,H,L,P (118) | overcast 8, perpendicular, North | 19:34               | 12.13 %                                                       |
|                      |                                  |                     |                                                               |
| Fig. S5A,E,I,M (263) | overcast 1, parallel, East       | 6:20                | 36.82 %                                                       |
| Fig. S5B,F,J,N (241) | overcast 2, parallel, East       | 8:08                | 49.15 %                                                       |
| Fig. S5C,G,K,O (172) | overcast 3, parallel, East       | 10:07               | 38.20 %                                                       |
| Fig. S5D,H,L,P (103) | overcast 4, parallel, East       | 12:05               | 32.40 %                                                       |
| Fig. S6A,E,I,M (191) | overcast 5, parallel, East       | 14:12               | 29.56 %                                                       |
| Fig. S6B,F,J,N (178) | overcast 6, parallel, East       | 16:06               | 39.29 %                                                       |
| Fig. S6C,G,K,O (130) | overcast 7, parallel, East       | 18:06               | 35.19 %                                                       |
| Fig. S6D,H,L,P (145) | overcast 8, parallel, East       | 19:35               | 48.20 %                                                       |

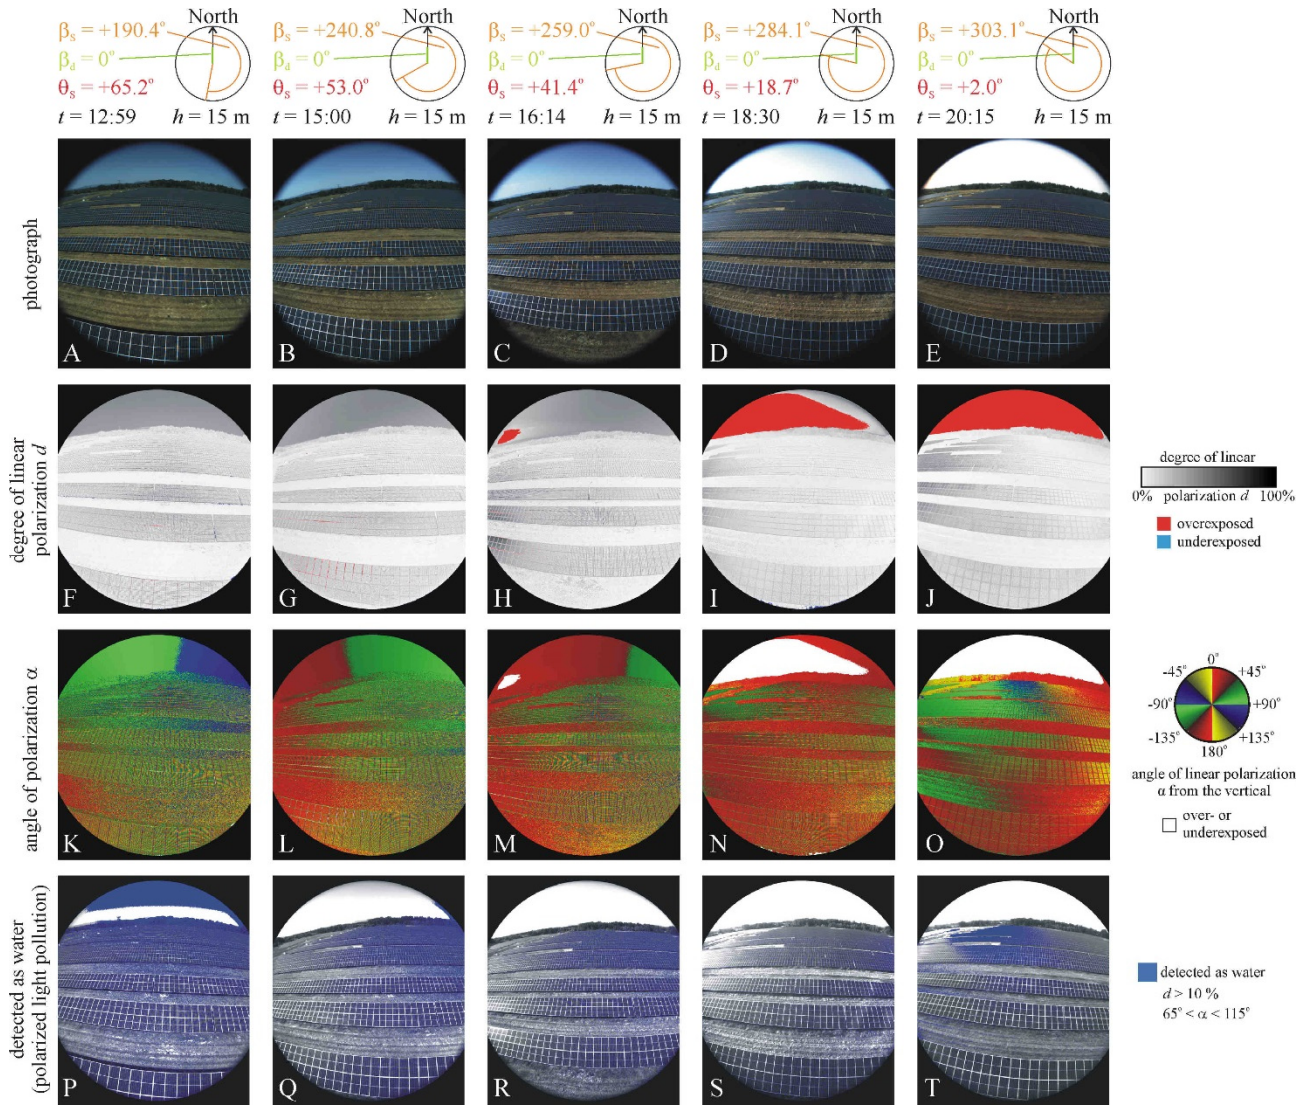

**Supplementary Figure S1:** Continuation of Fig. 2. From noon to sunset: (A, F, K, P)  $t = 12:59$ ,  $h = 15$  m,  $\beta_s = +190.41^\circ$ ,  $\theta_s = +65.16^\circ$ ,  $\beta_d = 0^\circ$ . (B, G, L, Q)  $t = 15:00$ ,  $h = 15$  m,  $\beta_s = +240.84^\circ$ ,  $\theta_s = +52.98^\circ$ ,  $\beta_d = 0^\circ$ . (C, H, M, R)  $t = 16:14$ ,  $h = 15$  m,  $\beta_s = +259.01^\circ$ ,  $\theta_s = +41.41^\circ$ ,  $\beta_d = 0^\circ$ . (D, I, N, S)  $t = 18:30$ ,  $h = 15$  m,  $\beta_s = +284.14^\circ$ ,  $\theta_s = +18.7^\circ$ ,  $\beta_d = +0^\circ$ . (E, J, O, T)  $t = 20:15$ ,  $h = 15$  m,  $\beta_s = +303.09^\circ$ ,  $\theta_s = +1.98^\circ$ ,  $\beta_d = +0^\circ$ .

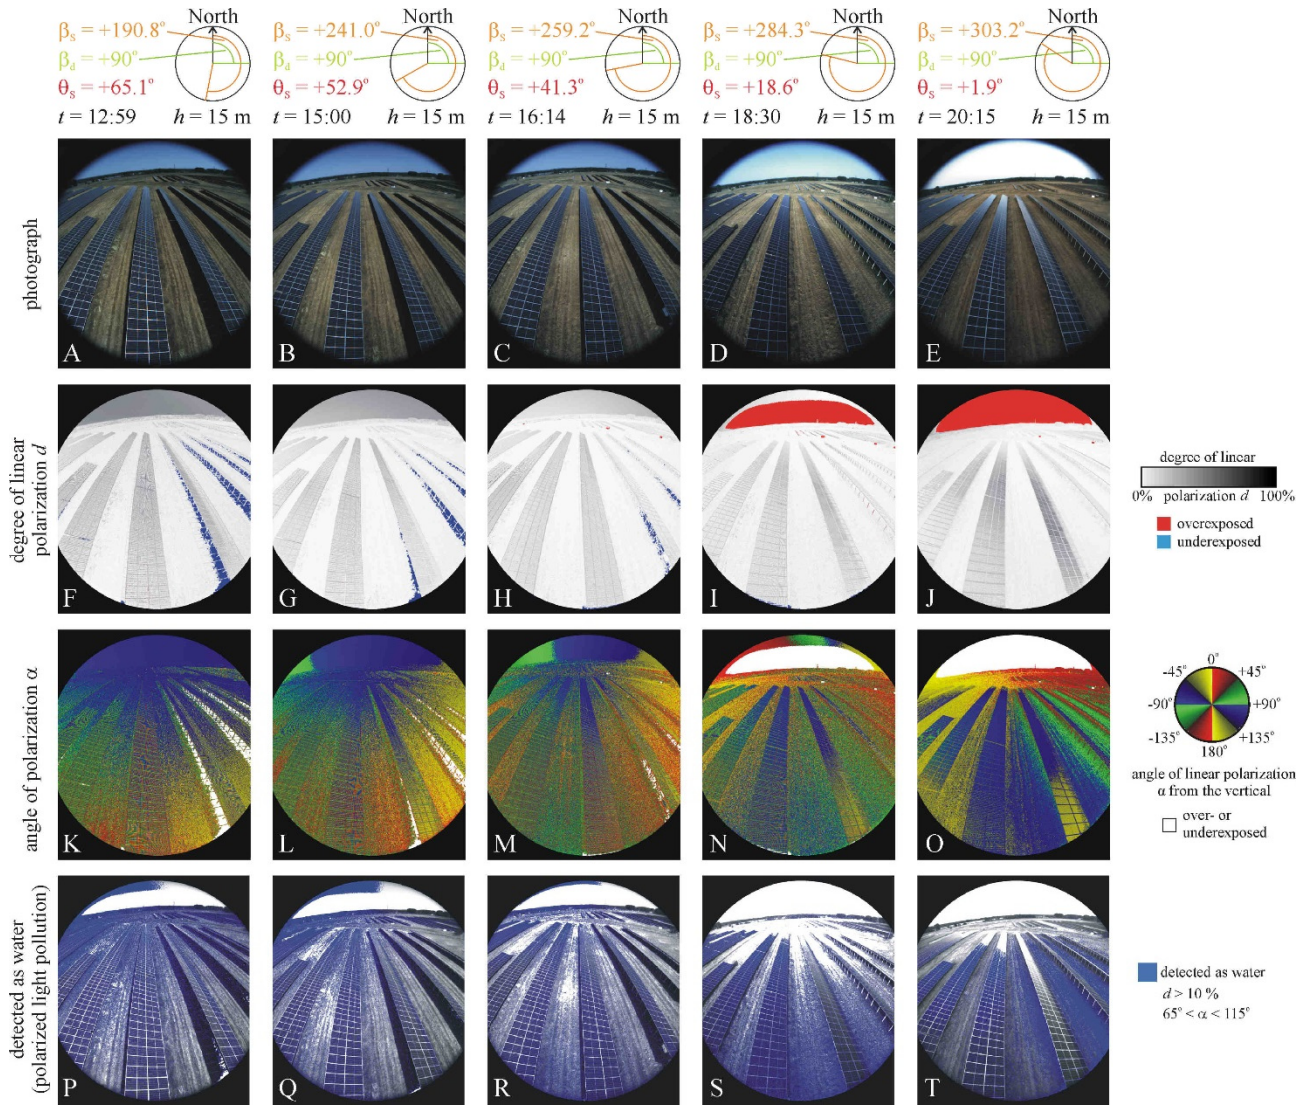

**Supplementary Figure S2:** Continuation of Fig. 3. From noon to sunset: (A, F, K, P)  $t = 12:59$ ,  $h = 15$  m,  $\beta_s = +190.79^\circ$ ,  $\theta_s = +65.14^\circ$ ,  $\beta_d = +90^\circ$ . (B, G, L, Q)  $t = 15:00$ ,  $h = 15$  m,  $\beta_s = +241.01^\circ$ ,  $\theta_s = +52.89^\circ$ ,  $\beta_d = +90^\circ$ . (C, H, M, R)  $t = 16:14$ ,  $h = 15$  m,  $\beta_s = +259.16^\circ$ ,  $\theta_s = +41.29^\circ$ ,  $\beta_d = +90^\circ$ . (D, I, N, S)  $t = 18:30$ ,  $h = 15$  m,  $\beta_s = +284.25^\circ$ ,  $\theta_s = +18.6^\circ$ ,  $\beta_d = +90^\circ$ . (E, J, O, T)  $t = 20:15$ ,  $h = 15$  m,  $\beta_s = +303.22^\circ$ ,  $\theta_s = +1.88^\circ$ ,  $\beta_d = +90^\circ$ .



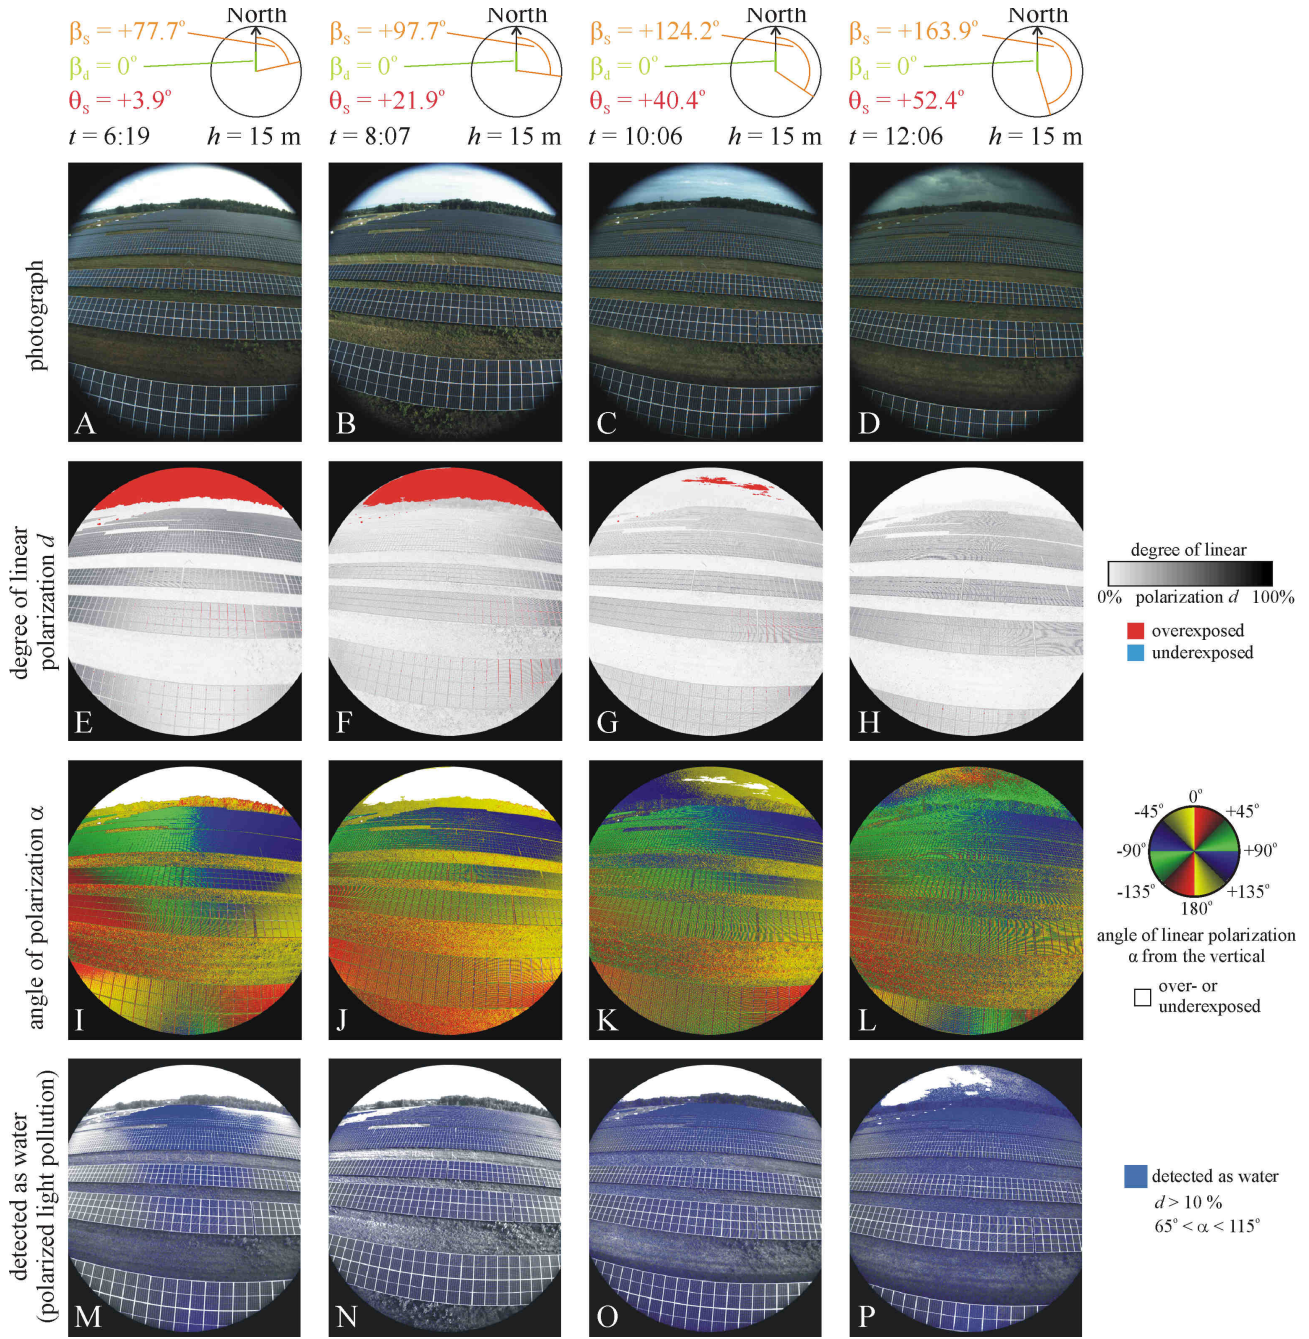

**Supplementary Figure S3:** As Supplementary Fig. S1 measured on an overcast day (24 August 2022) when the azimuth of the drone's optical axis was perpendicular to the panel rows. From sunrise to noon: (A, E, I, M)  $t = 6:19$ ,  $h = 15$  m,  $\beta_s = +77.73^\circ$ ,  $\theta_s = +3.88^\circ$ ,  $\beta_d = +0^\circ$ . (B, F, J, N)  $t = 8:07$ ,  $h = 15$  m,  $\beta_s = +97.73^\circ$ ,  $\theta_s = +21.94^\circ$ ,  $\beta_d = +0^\circ$ . (C, G, K, O)  $t = 10:06$ ,  $h = 15$  m,  $\beta_s = +124.17^\circ$ ,  $\theta_s = +40.42^\circ$ ,  $\beta_d = +0^\circ$ . (D, H, L, P)  $t = 12:06$ ,  $h = 15$  m,  $\beta_s = +163.92^\circ$ ,  $\theta_s = +52.39^\circ$ ,  $\beta_d = +0^\circ$ .

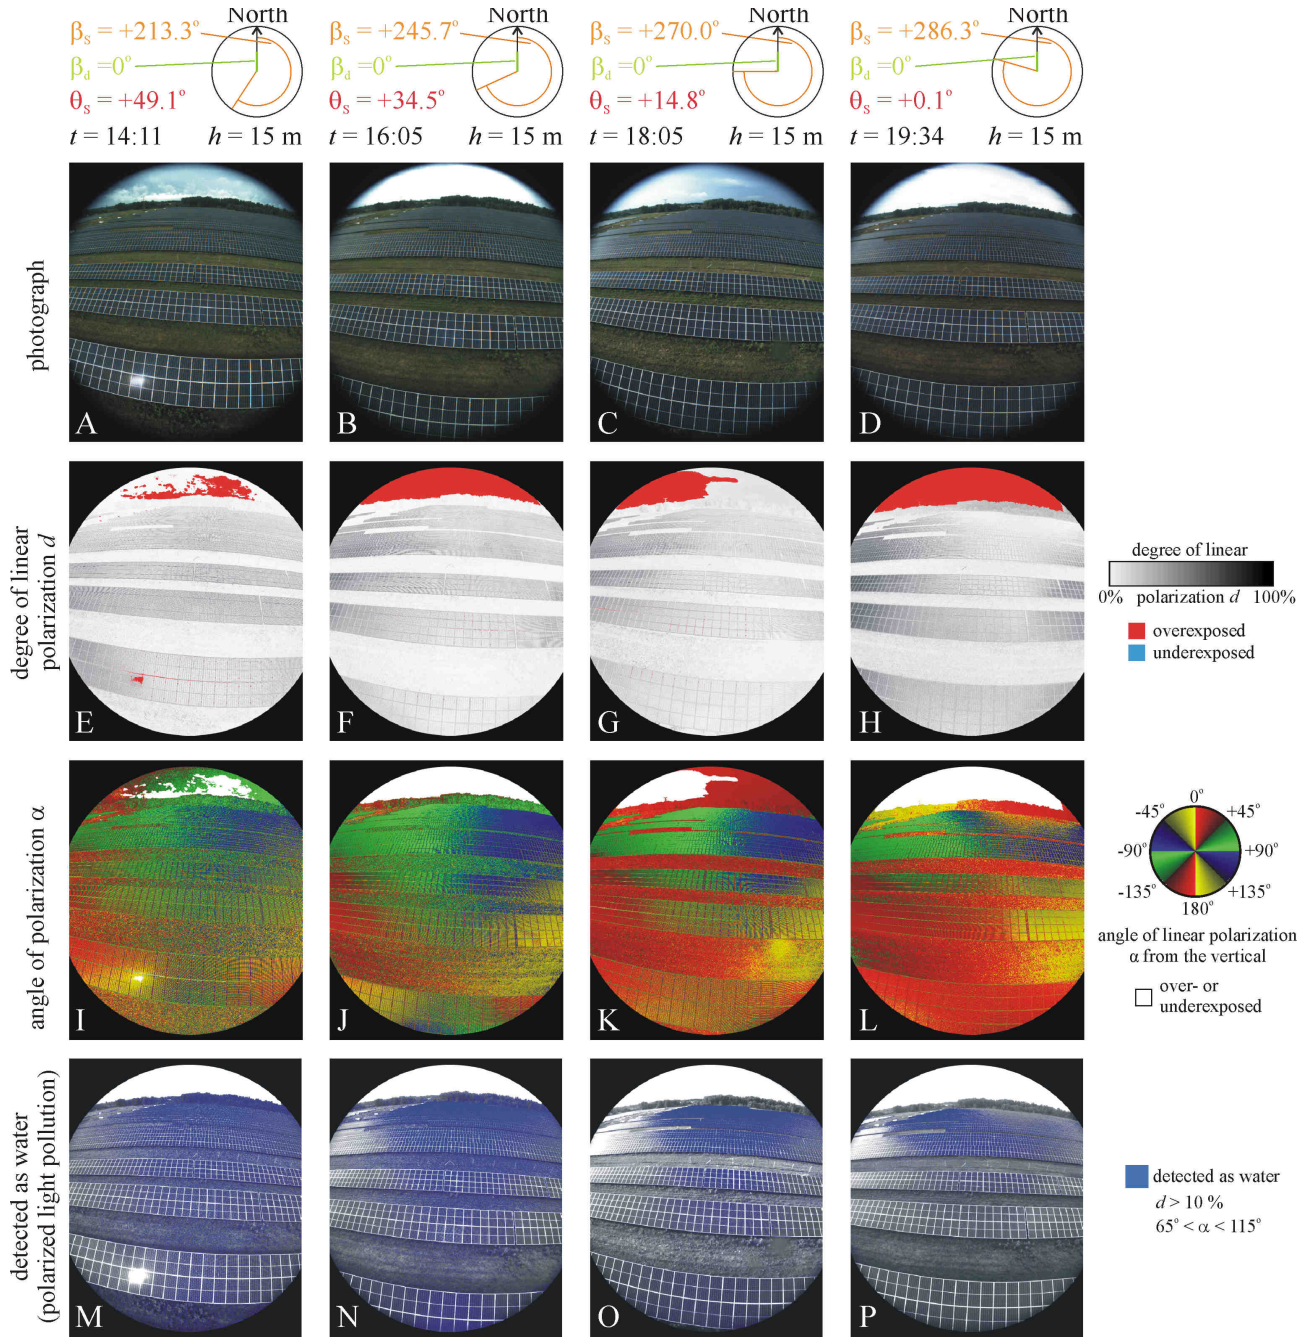

**Supplementary Figure S4:** Continuation of Supplementary Fig. S3. From noon to sunset: (A, E, I, M)  $t = 14:11$ ,  $h = 15$  m,  $\beta_s = +213.32^\circ$ ,  $\theta_s = +49.1^\circ$ ,  $\beta_d = 0^\circ$ . (B, F, J, N)  $t = 16:05$ ,  $h = 15$  m,  $\beta_s = +245.73^\circ$ ,  $\theta_s = +34.45^\circ$ ,  $\beta_d = 0^\circ$ . (C, G, K, O)  $t = 18:05$ ,  $h = 15$  m,  $\beta_s = +270.04^\circ$ ,  $\theta_s = +14.83^\circ$ ,  $\beta_d = 0^\circ$ . (D, H, L, P)  $t = 19:34$ ,  $h = 15$  m,  $\beta_s = +286.27^\circ$ ,  $\theta_s = +0.07^\circ$ ,  $\beta_d = 0^\circ$ .



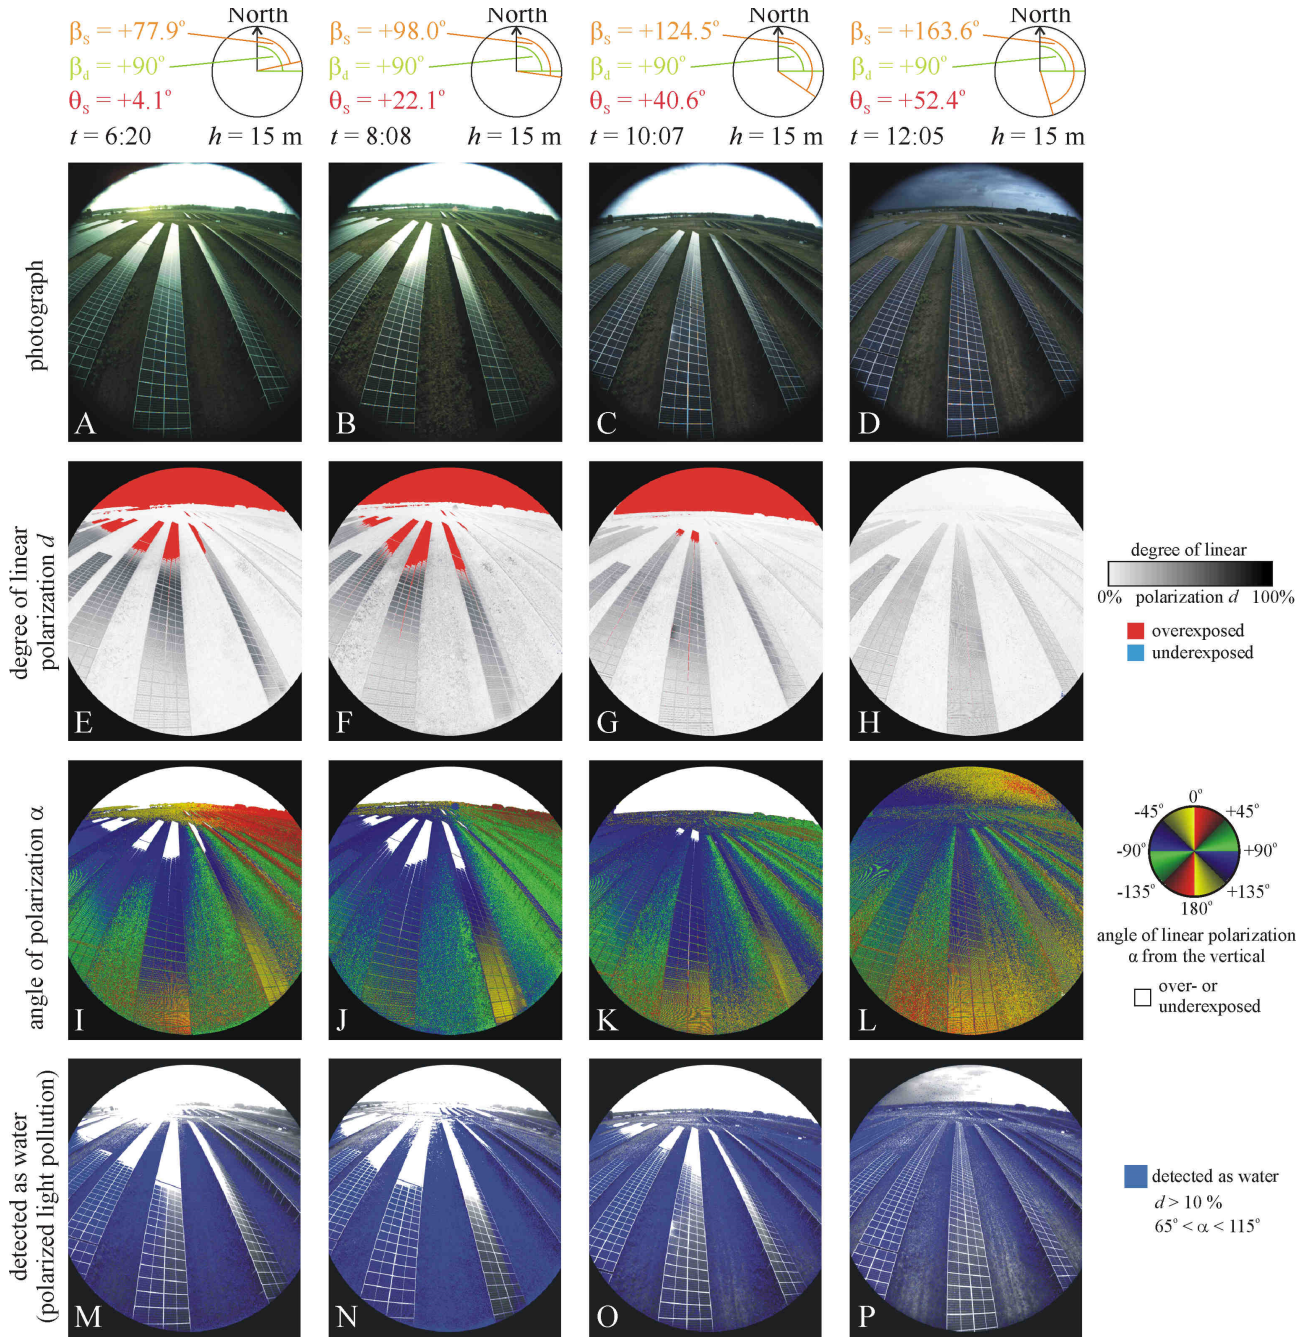

**Supplementary Figure S5:** As Supplementary Fig. S3 when the azimuth of the drone's optical axis was parallel to the panel rows. From sunrise to noon: (A, E, I, M)  $t = 6:20$ ,  $h = 15$  m,  $\beta_s = +77.91^\circ$ ,  $\theta_s = +4.05^\circ$ ,  $\beta_d = +90^\circ$ . (B, F, J, N)  $t = 8:08$ ,  $h = 15$  m,  $\beta_s = +97.95^\circ$ ,  $\theta_s = +22.12^\circ$ ,  $\beta_d = +90^\circ$ . (C, G, K, O)  $t = 10:07$ ,  $h = 15$  m,  $\beta_s = +124.47^\circ$ ,  $\theta_s = +40.58^\circ$ ,  $\beta_d = +90^\circ$ . (D, H, L, P)  $t = 12:05$ ,  $h = 15$  m,  $\beta_s = +163.61^\circ$ ,  $\theta_s = +52.36^\circ$ ,  $\beta_d = +90^\circ$ .

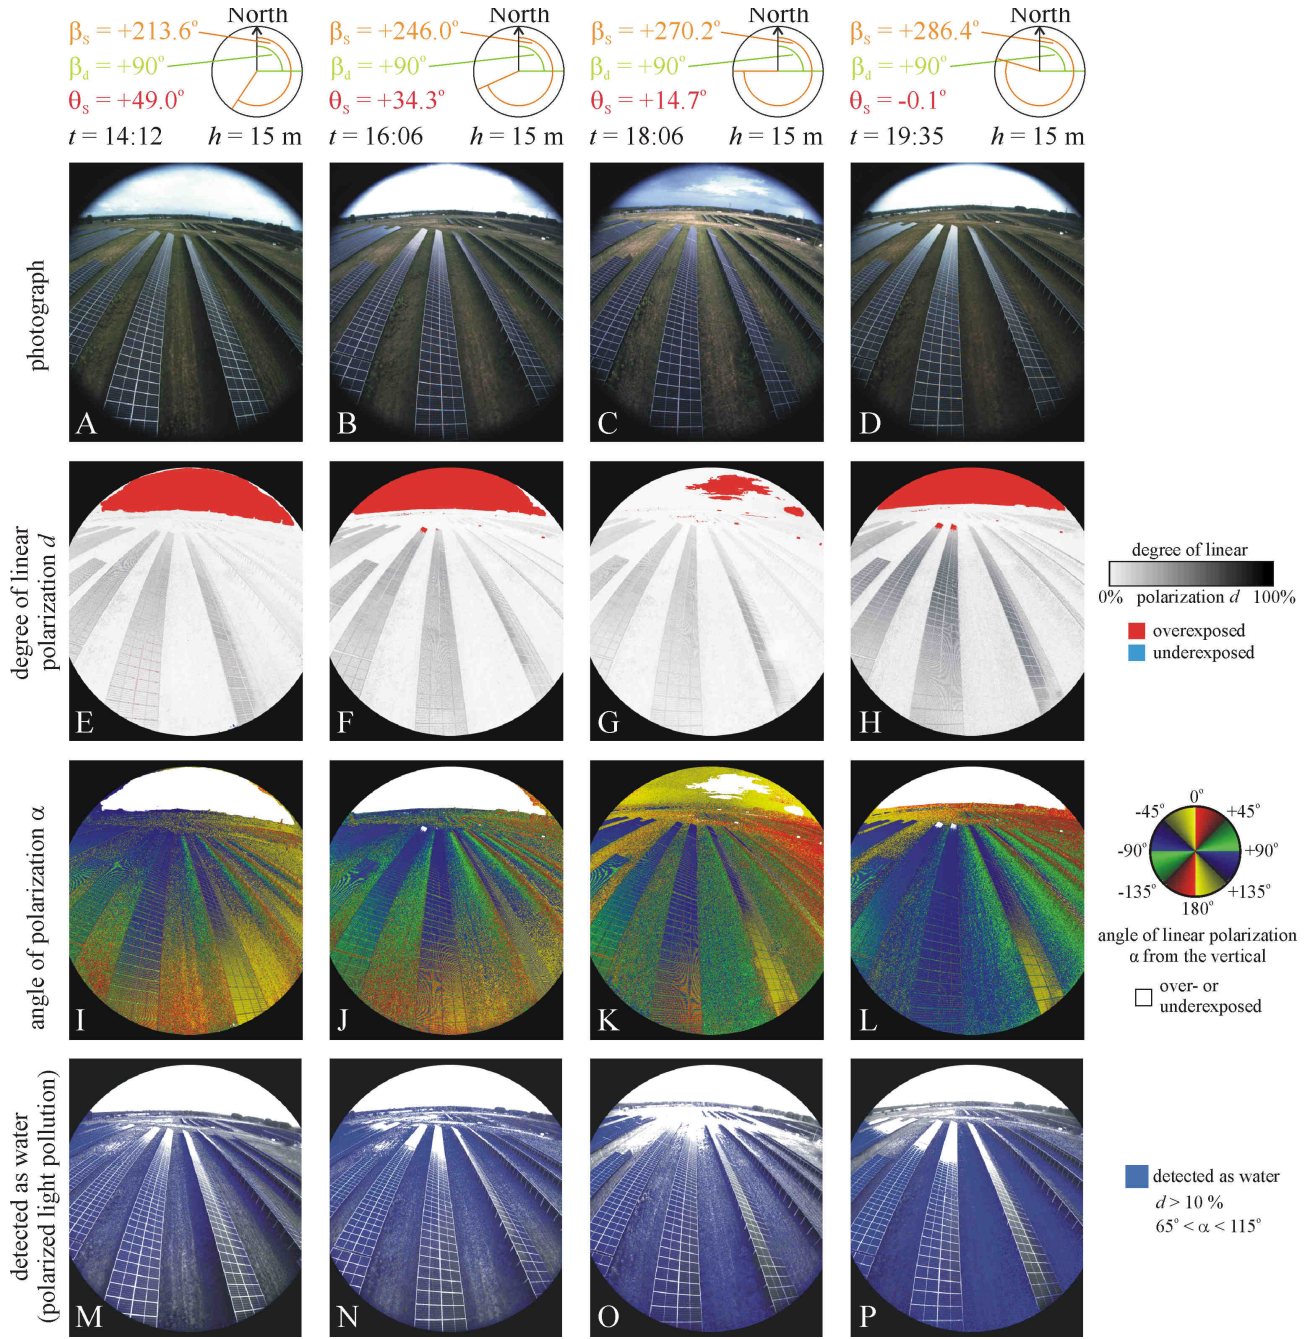

**Supplementary Figure S6:** Continuation of Supplementary Fig. S5. From noon to sunset: (A, E, I, M)  $t = 14:12$ ,  $h = 15 \text{ m}$ ,  $\beta_s = +213.63^\circ$ ,  $\theta_s = +49.01^\circ$ ,  $\beta_d = +90^\circ$ . (B, F, J, N)  $t = 16:06$ ,  $h = 15 \text{ m}$ ,  $\beta_s = +245.96^\circ$ ,  $\theta_s = +34.3^\circ$ ,  $\beta_d = +90^\circ$ . (C, G, K, O)  $t = 18:06$ ,  $h = 15 \text{ m}$ ,  $\beta_s = +270.21^\circ$ ,  $\theta_s = +14.68^\circ$ ,  $\beta_d = +90^\circ$ . (D, H, L, P)  $t = 19:35$ ,  $h = 15 \text{ m}$ ,  $\beta_s = +286.43^\circ$ ,  $\theta_s = -0.07^\circ$ ,  $\beta_d = +90^\circ$ .
